# Supplementary material for: Synergistic Drug Combinations Prevent Resistance in ALK+ Anaplastic Large Cell Lymphoma
Source: MDPI journal article supplement (doi:10.3390/cancers13174422), 2021-09-01
Supplement: s1 [file s1]

# Supplementary Materials: Synergistic Drug Combinations Prevent Resistance in ALK+ Anaplastic Large Cell Lymphoma

Giulia Arosio, Geeta G. Sharma, Matteo Villa, Mario Mauri, Ilaria Crespiatico, Diletta Fontana, Chiara Manfroni, Cristina Mastini, Marina Zappa, Vera Magistroni, Monica Ceccon, Sara Redaelli, Luca Massimino, Anna Garbin, Federica Lovisa, Lara Mussolin, Rocco Piazza, Carlo Gambacorti-Passerini and Luca Mologni

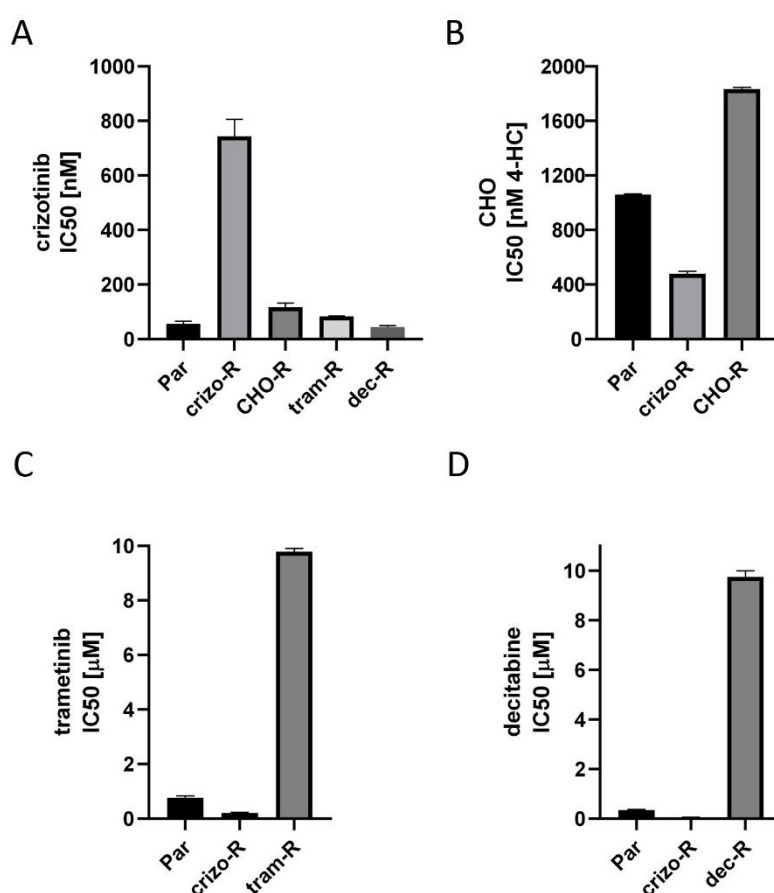

**Figure S1.** Cross-sensitivity of drug-resistant cells. SUP-M2 cells resistant (-R) to crizotinib, CHO, decitabine or trametinib were challenged with (A) crizotinib, (B) CHO, (C) trametinib, and (D) decitabine. The IC50 values (mean + SEM) are reported in the graphs. Par = parental cells.

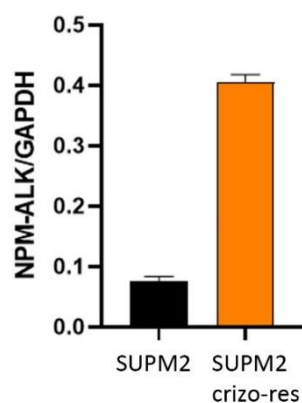

**Figure S2.** Quantitative analysis of NPM-ALK mRNA expression in parental (black bar) versus crizotinib-resistant SUP-M2 cells (orange).

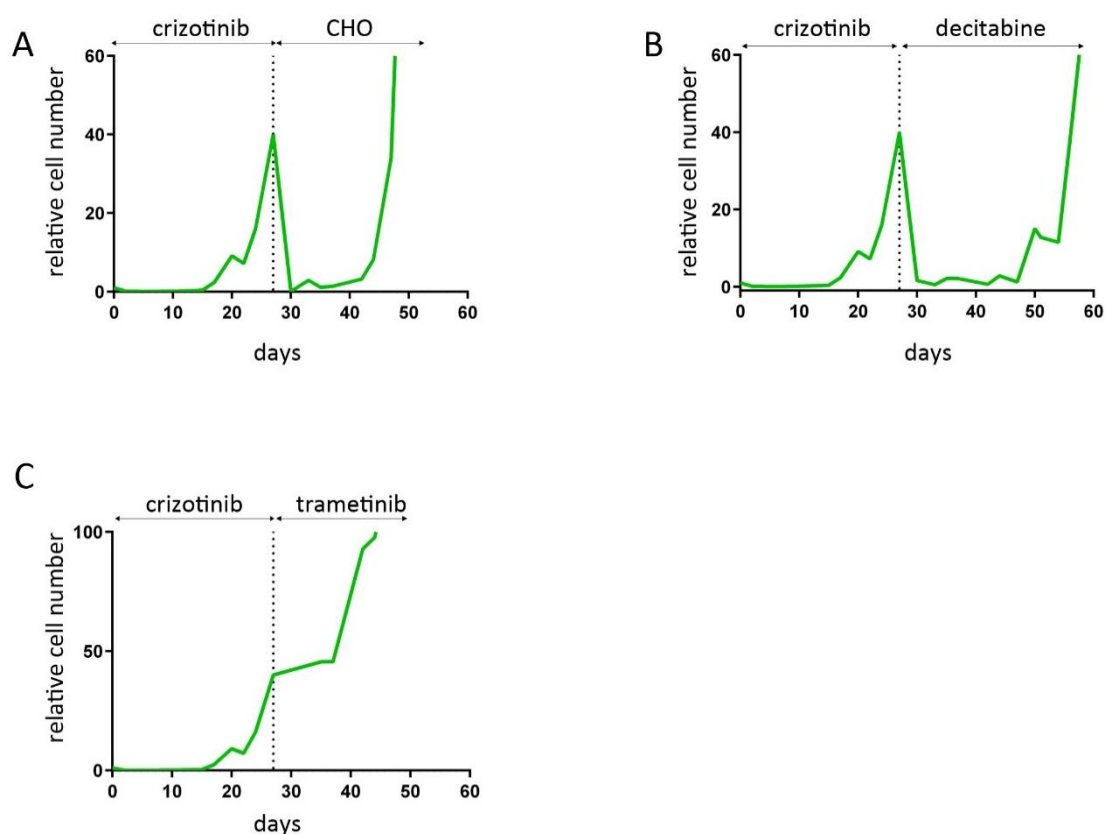

**Figure S3.** Sequential treatment combinations. SUP-M2 cells were grown in the presence of 100 nM crizotinib until a resistant population emerged. On day 27 of culture (dotted line) crizotinib-resistant cells were shifted to (A) CHO, or (B) decitabine, or (C) trametinib. In all three cases, a new double-resistant cell culture appeared. In the same experiment, simultaneous combinations confirmed full suppression of resistance, as depicted in Figure 1 (not shown here).

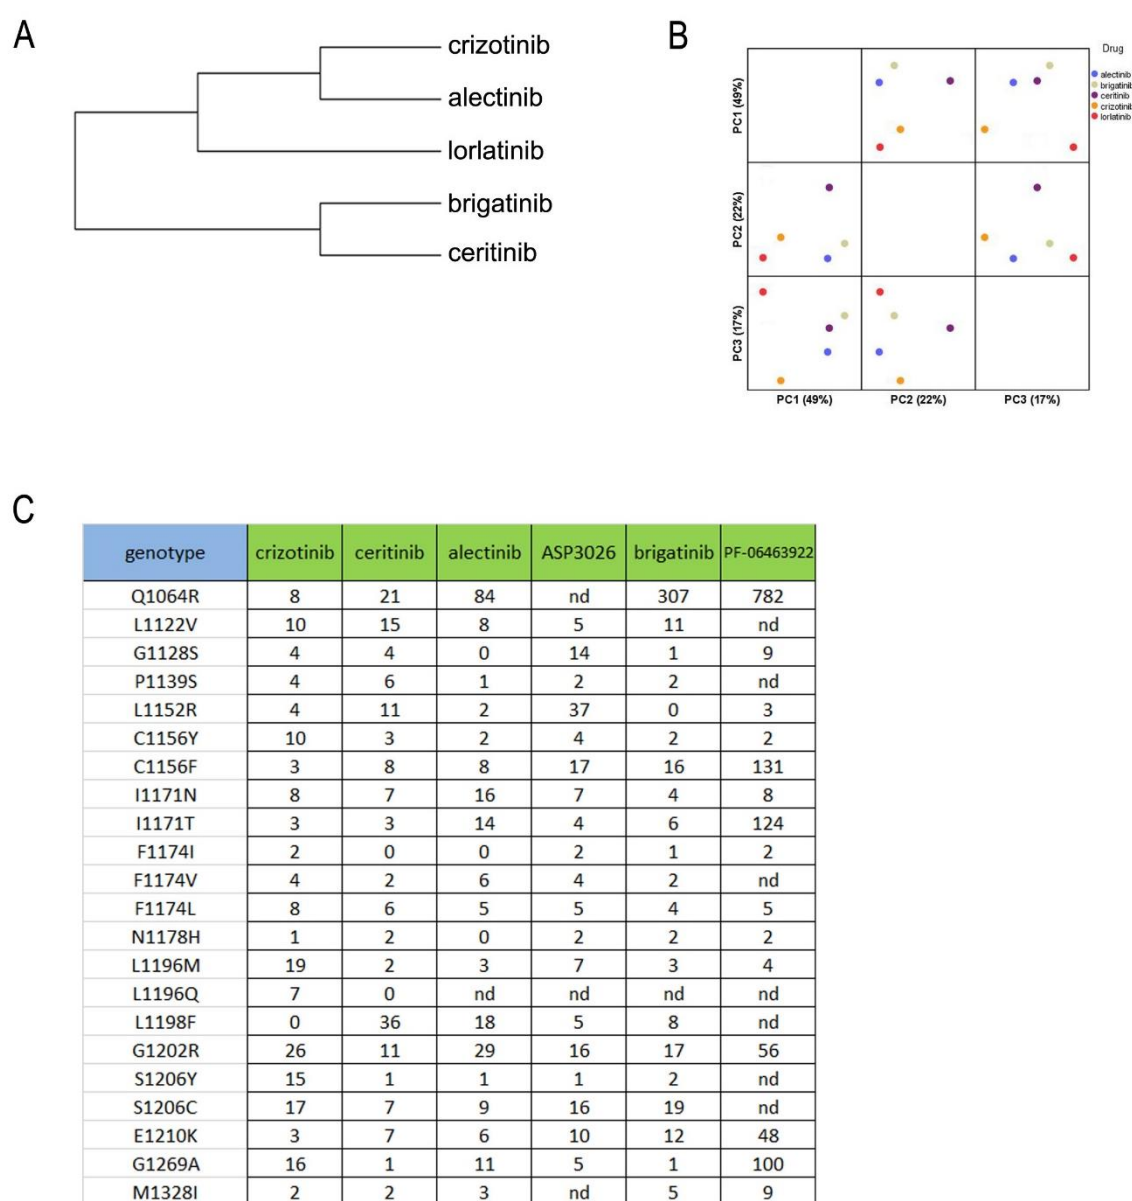

**Figure S4.** (A) Neighbour joining tree analysis shows clustering of ALK inhibitors based on their profiles of activity against mutants. Pairwise distances were calculated by Principal Component Analysis (B) of the data shown in panel C; the tree was inferred using the Minimum Evolution method. (C) Relative resistance index values calculated as mutant IC<sub>50</sub> fold increase relative to wild-type ALK (WT = 1). The raw data were obtained using BaF3-NPM/ALK cells as described (ref. 11).

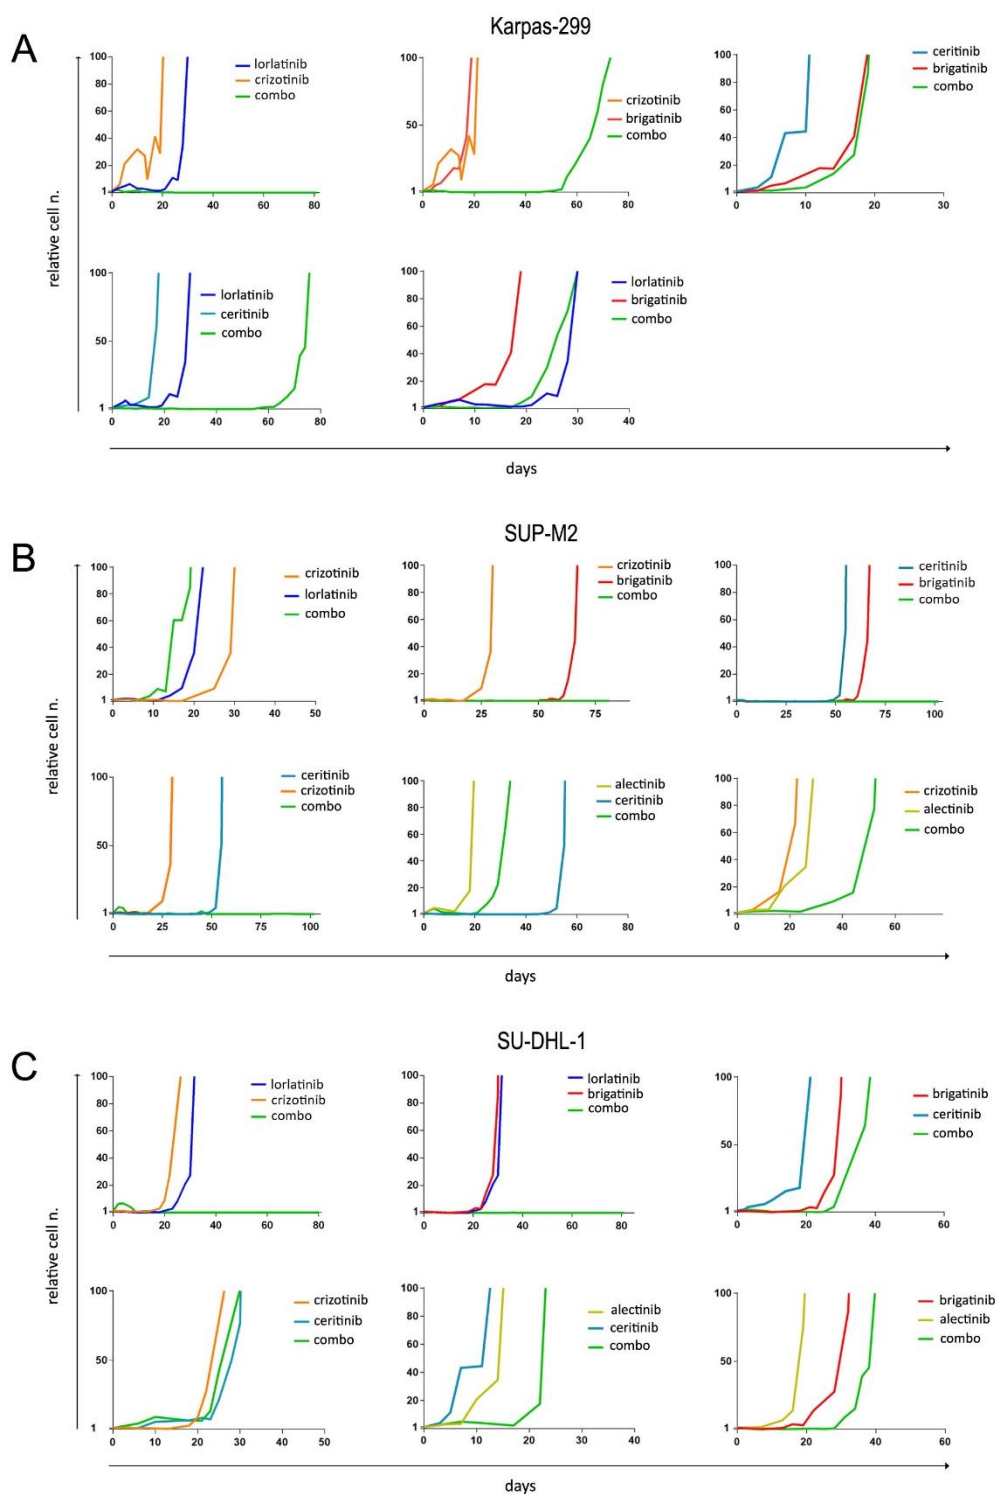

**Figure S5.** Long-term TKI-TKI combinations. (A) Karpas-299, (B) SUP-M2 and (C) SU-DHL-1, cells were cultured in the presence of the indicated inhibitors, full-dose single (crizotinib, 100 nM; brigatinib, 40 nM; ceritinib, 50 nM; lorlatinib, 8 nM) or half-dose combination. Cumulative cell count is shown, relative to day 0. Experiments were halted earlier when combo showed cells outgrowth.

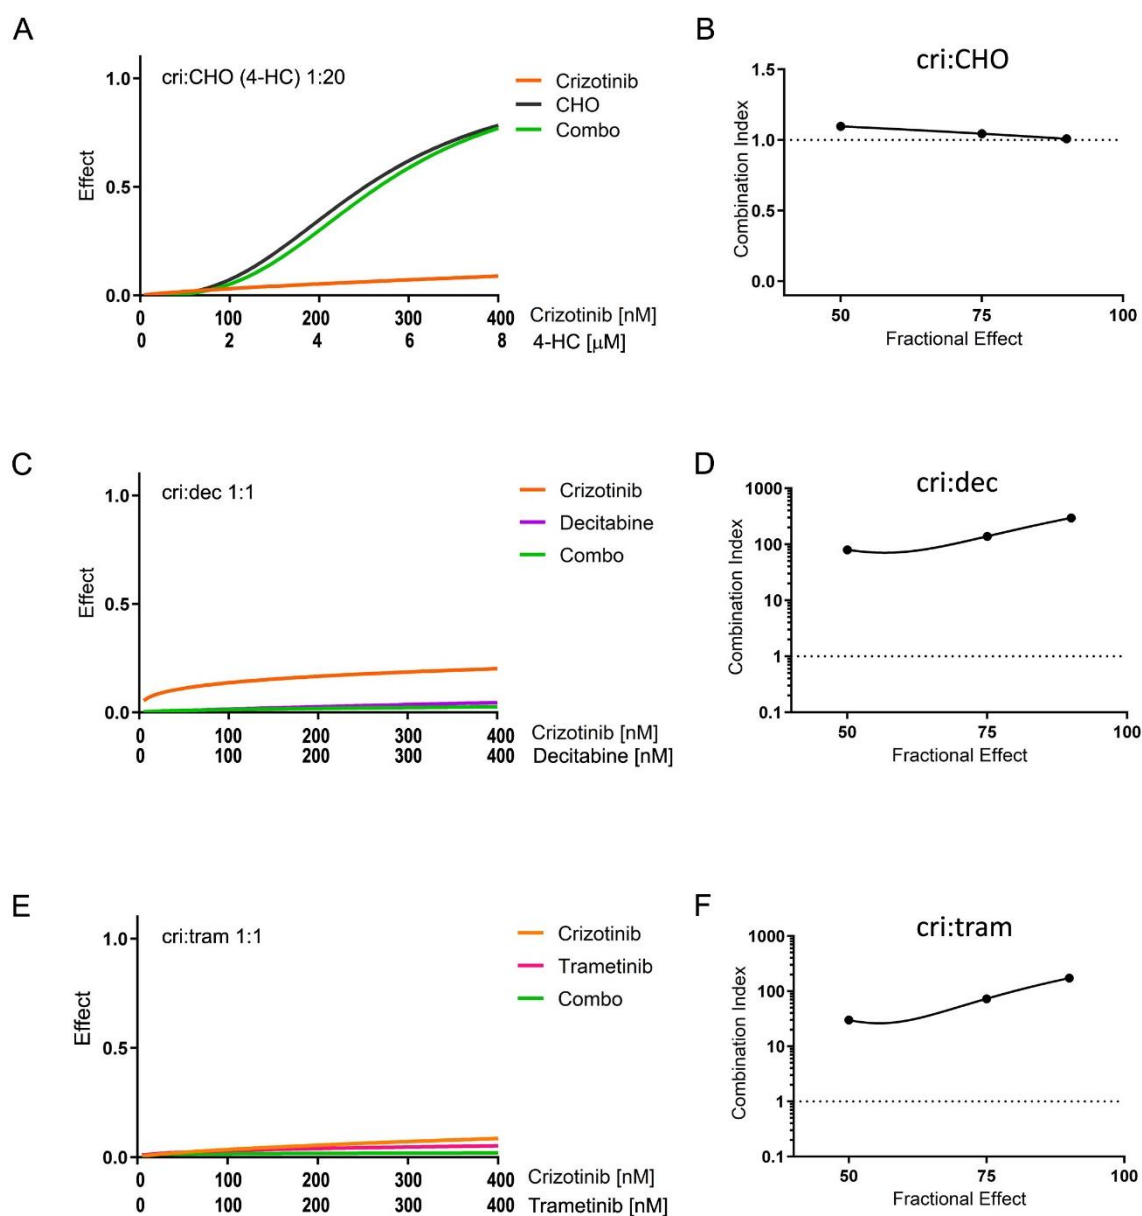

**Figure S6.** Synergism analysis in U937 cells. The cells were treated with vehicle, or single drugs, or combinations (**A,C,E**) Dose-effect curves and (**B,D,F**) combination index values were calculated as described in the legend of Figure 2. (**A,B**) Crizotinib+CHO; (**C,D**) Crizotinib+Decitabine; (**E,F**) Crizotinib+Trametinib.

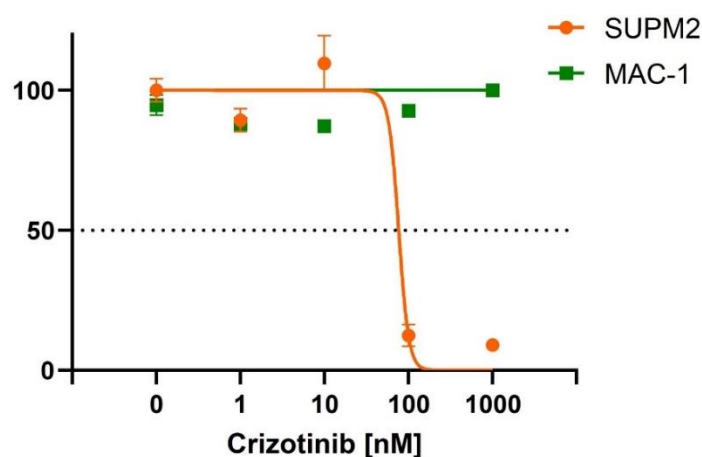

**Figure S7.** Insensitivity of ALK-negative ALCL cells to crizotinib. SUP-M2 (ALK+) and MAC1 (ALK-) cells were treated with increasing doses of crizotinib. MAC1 cells do not show any response to the drug up to 1  $\mu$ M.

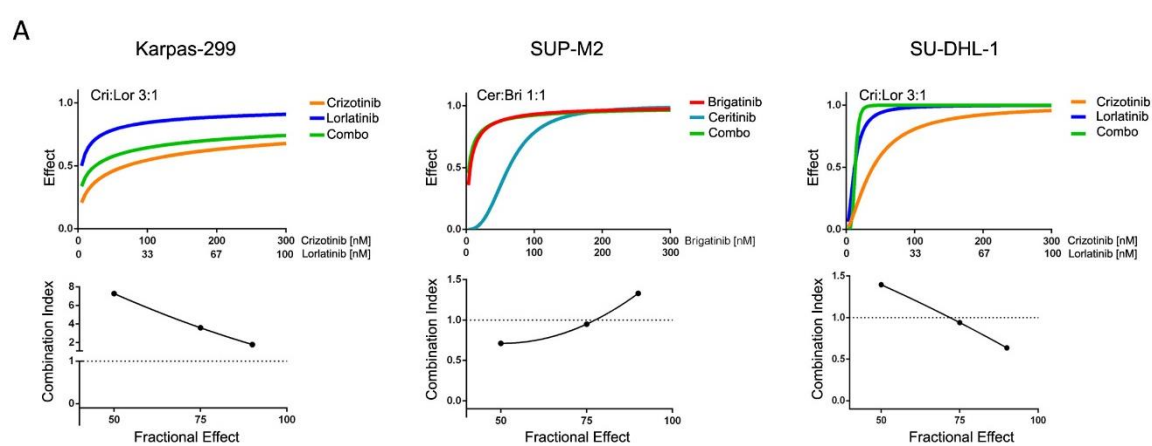

**B**

|         |            |      |       |       |       |       |                        |   |
|---------|------------|------|-------|-------|-------|-------|------------------------|---|
| CRI:LOR | Karpas 299 | 3:1  | 7.286 | 3.594 | 1.782 | 4.221 | Strong Antagonism      | ● |
|         | Karpas 299 | 10:1 | 2.349 | 2.783 | 3.297 | 2.810 | Antagonism             | ● |
|         | Karpas 299 | 30:1 | 0.969 | >10   | >10   | >10   | Very Strong Antagonism | ● |
|         | SU-DHL-1   | 3:1  | 1.396 | 0.941 | 0.637 | 0.992 | Nearly Additive        | ● |
|         | SU-DHL-1   | 10:1 | 0.992 | 0.706 | 0.505 | 0.734 | Moderate Synergism     | ● |
|         | SU-DHL-1   | 30:1 | 1.558 | 1.102 | 0.783 | 1.148 | Slight Antagonism      | ● |
| CER:BRI | Karpas 299 | 1:1  | 0.869 | 1.043 | 1.285 | 1.065 | Nearly Additive        | ● |
|         | Karpas 299 | 1:2  | 0.997 | 1.007 | 1.039 | 1.014 | Nearly Additive        | ● |
|         | Karpas 299 | 1:3  | 1.006 | 0.986 | 0.982 | 0.991 | Nearly Additive        | ● |
|         | SUP-M2     | 1:1  | 0.712 | 0.950 | 1.330 | 0.997 | Nearly Additive        | ● |
|         | SUP-M2     | 3:1  | 0.385 | 0.726 | 1.511 | 0.874 | Slight Synergism       | ● |
|         | SUP-M2     | 10:1 | 0.014 | 0.115 | 1.077 | 0.402 | Synergism              | ● |

**Figure S8.** Synergism analysis of two ALK inhibitors combo. (A) Examples of dose-effect curves and (B) the corresponding CI values obtained with two TKI combinations that were able to prevent drug resistance in long-term experiments. Green, yellow and red dots in panel B indicate synergism, additivity and antagonism, respectively.

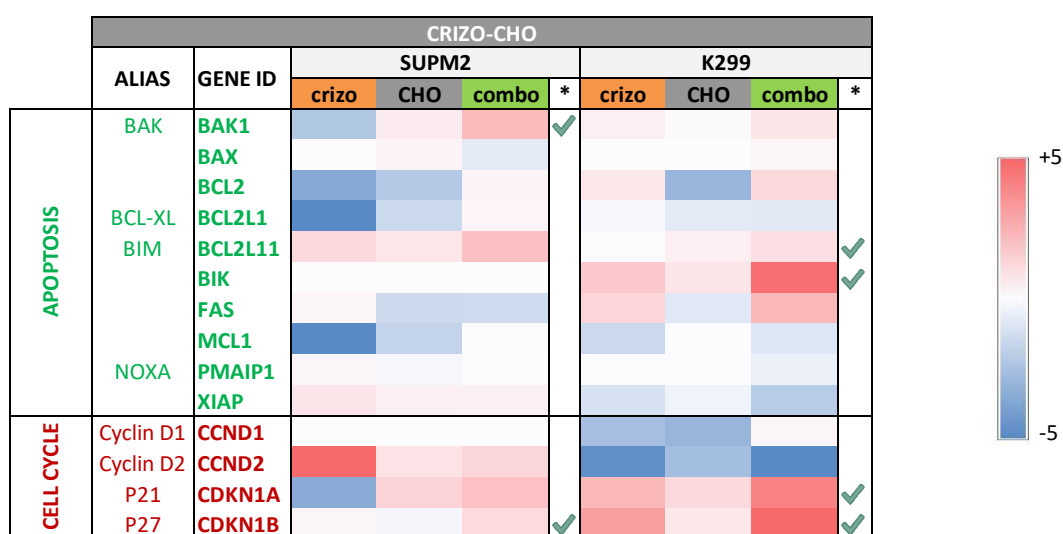

**Figure S9.** Heatmap of qPCR data obtained with crizotinib+CHO combination. The cells were treated for 72 hours, then total RNA was extracted and analyzed. Fold-change from DMSO-treated controls is reported. A tick in the right columns indicates significant changes in combo *vs* both singles.

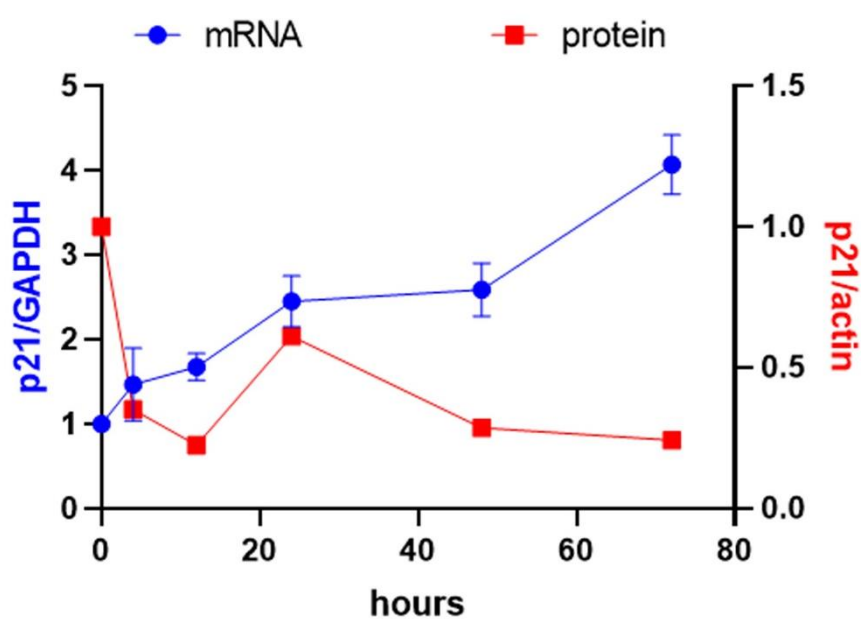

**Figure S10.** Time course of p21Waf1 expression in Karpas-299 cells treated with crizotinib+CHO. Cells were collected at 4, 12, 24, 48 and 72 hours from the start of treatment. RNA and proteins were extracted and analyzed. RNA expression was normalized to GAPDH; protein level was normalized to b-actin. Data are relative to time 0.

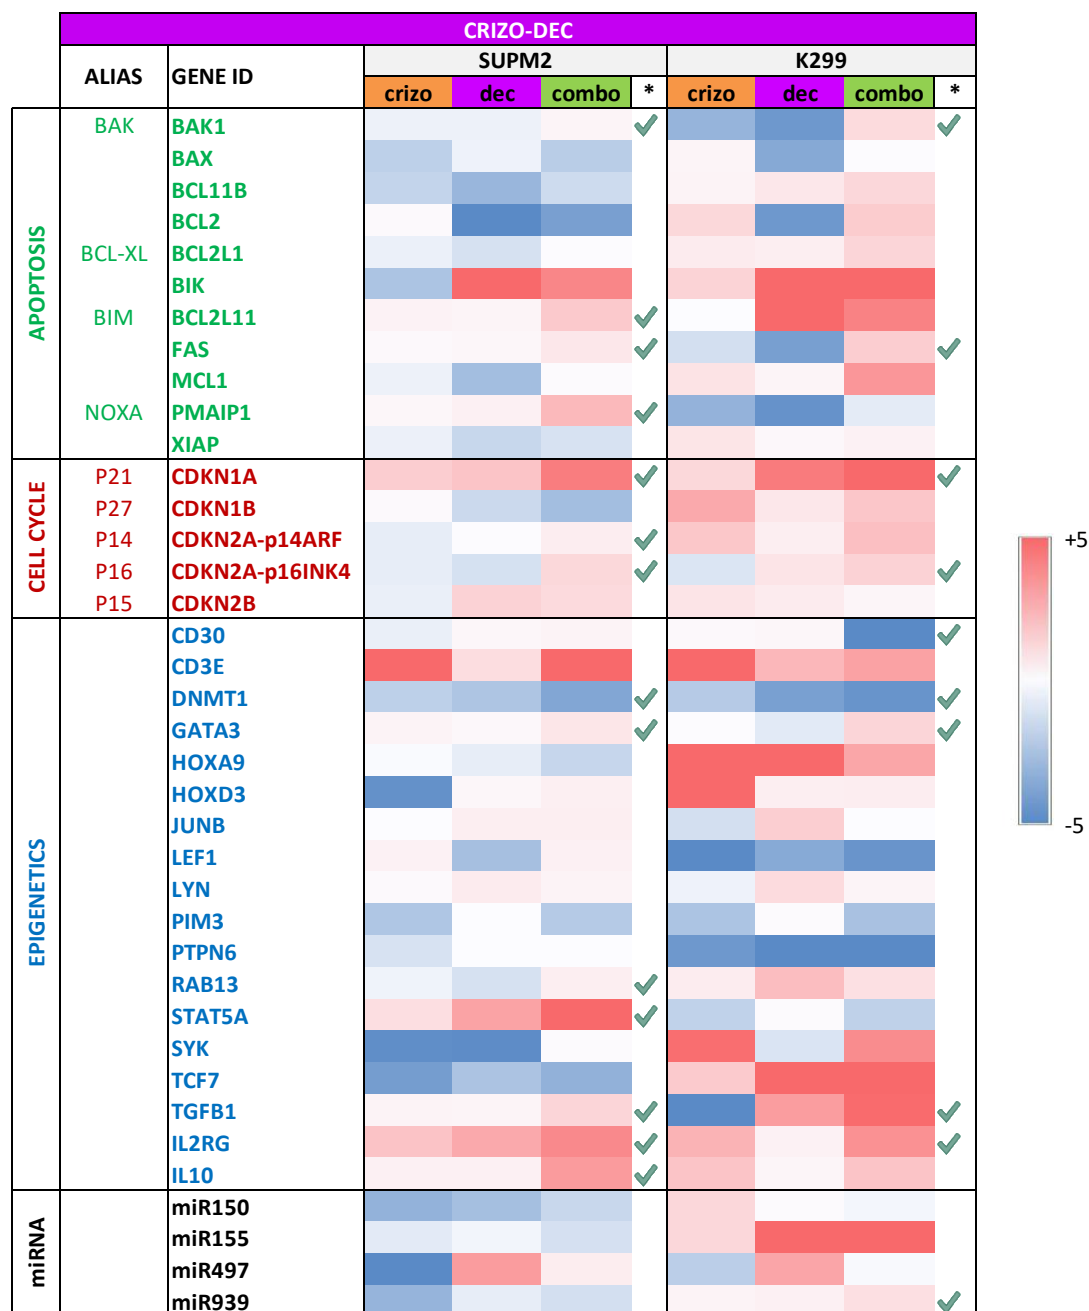

**Figure S11.** Heatmap of qPCR data obtained with crizotinib+decitabine combination. The cells were treated for 72 hours, then total RNA was extracted and analyzed. Fold-change from DMSO-treated controls is reported. A tick in the right columns indicates significant changes in combo vs both singles.

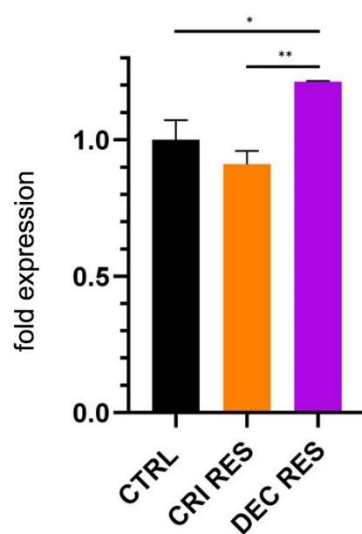

**Figure S12.** Real time PCR analysis of DNMT1 expression in SUP-M2 cells. CTRL = parental; CRI RES = resistant to crizotinib; DEC RES = resistant to decitabine.

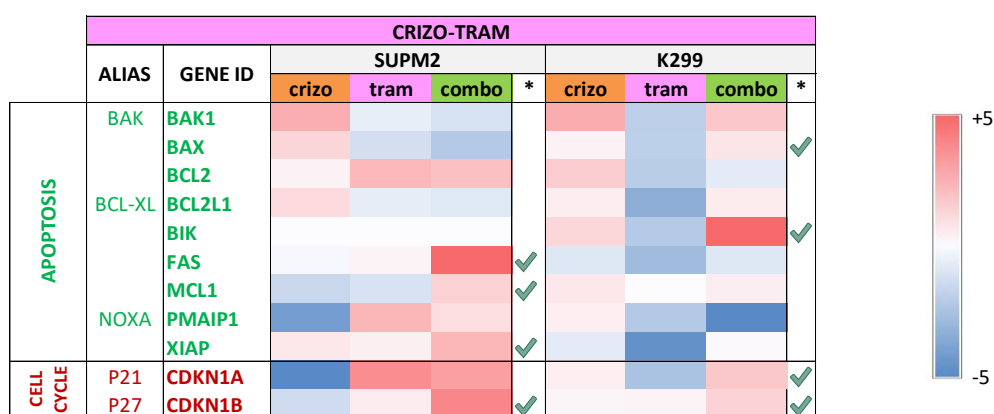

**Figure S13.** Heatmap of qPCR data obtained with crizotinib+trametinib combination. The cells were treated for 120 hours, then total RNA was extracted and analyzed. Fold-change from DMSO-treated controls is reported. A tick in the right columns indicates significant changes in combo *vs* both singles.

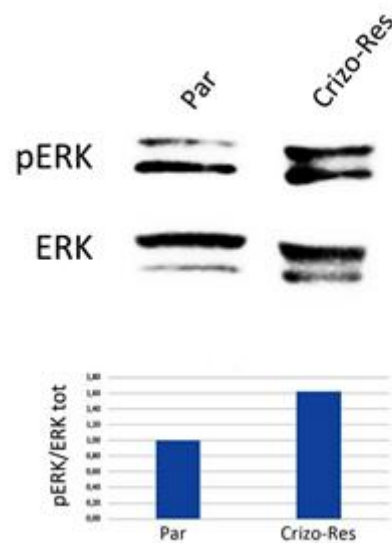

**Figure S14. (Top)** SUPM2 cells resistant to 120 nM crizotinib (Crizo-res) show 60% increase of ERK1/2 phosphorylation by Western blotting, compared to parental SUPM2 (Par). **(Bottom)** densitometry quantification of normalized pERK/total ERK signal.

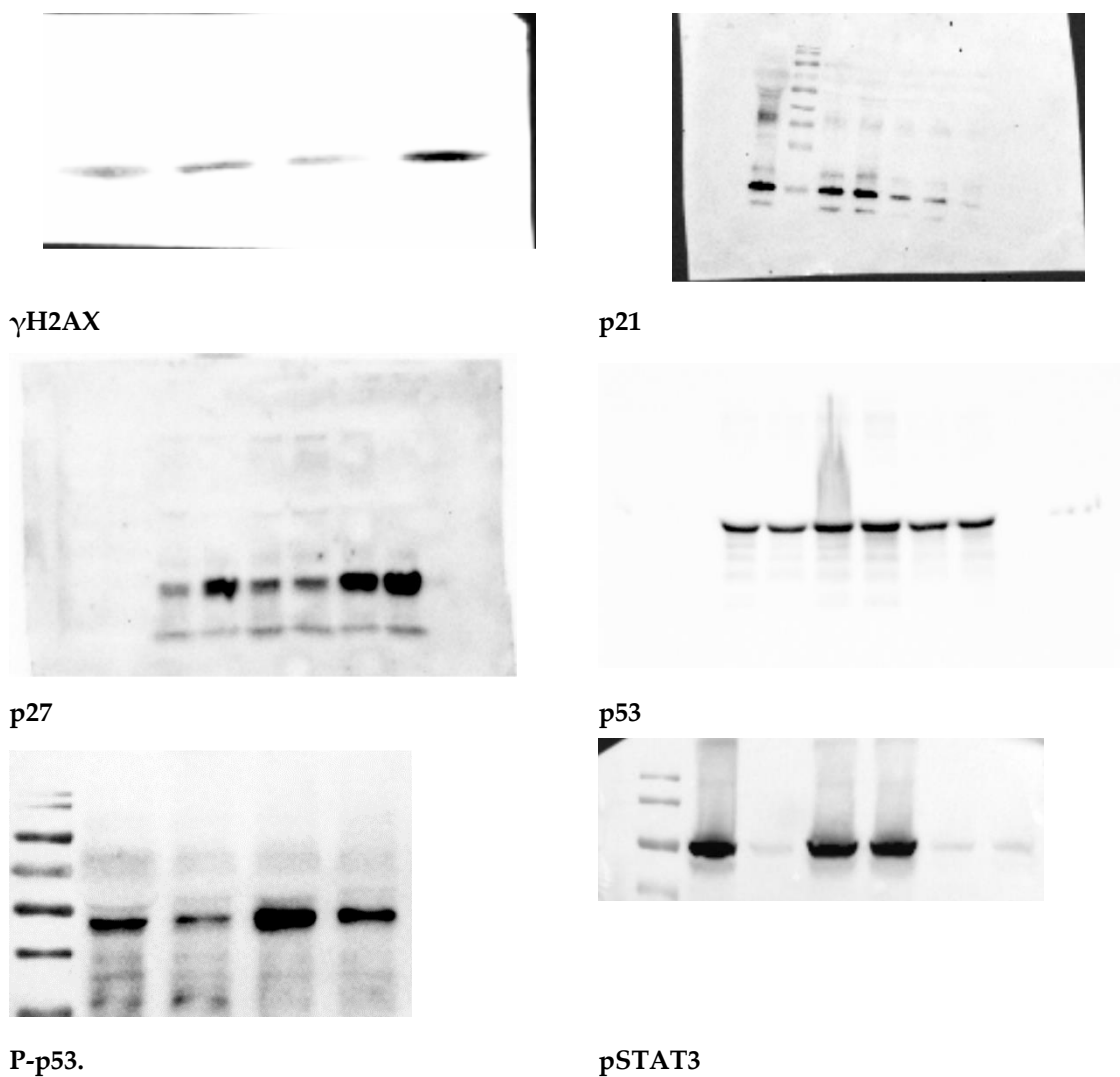

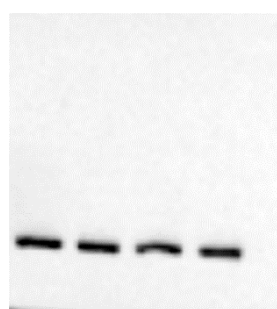

actin

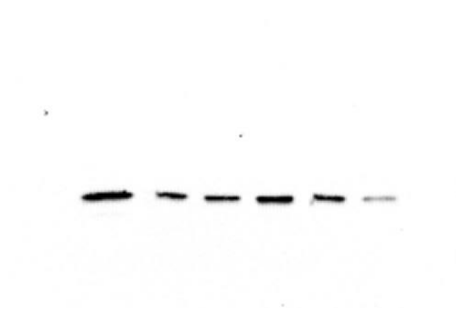

bcl2

Figure S15. Uncropped western blot figure for Figure 4E.

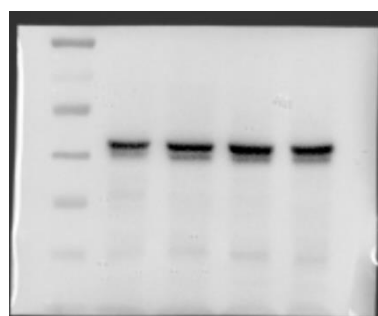

ERK

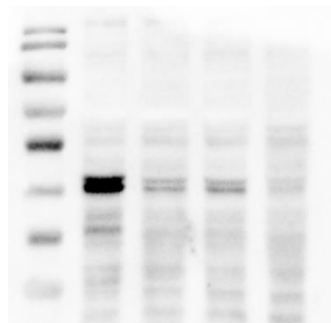

pERK

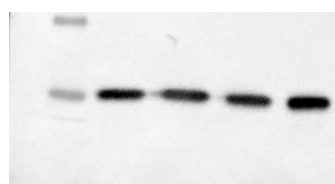

H3K4

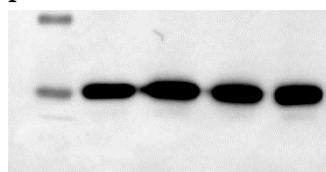

H3

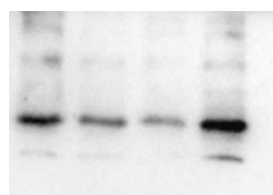

p16

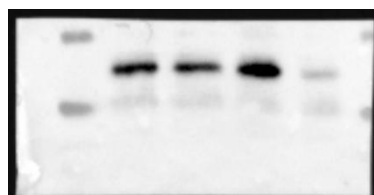

p21

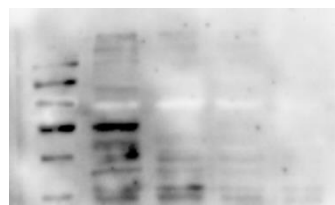

pJNK

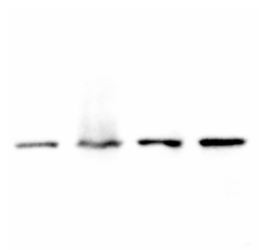

p53

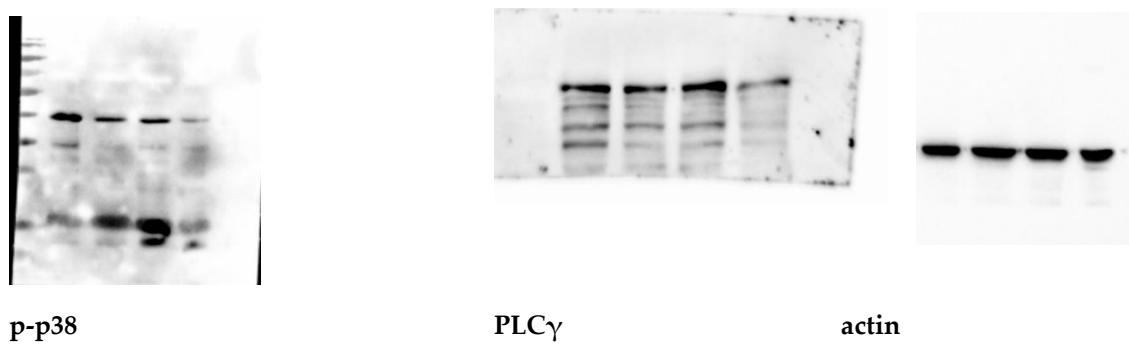

**Figure S16.** Uncropped western blot figure for Figure 5G.

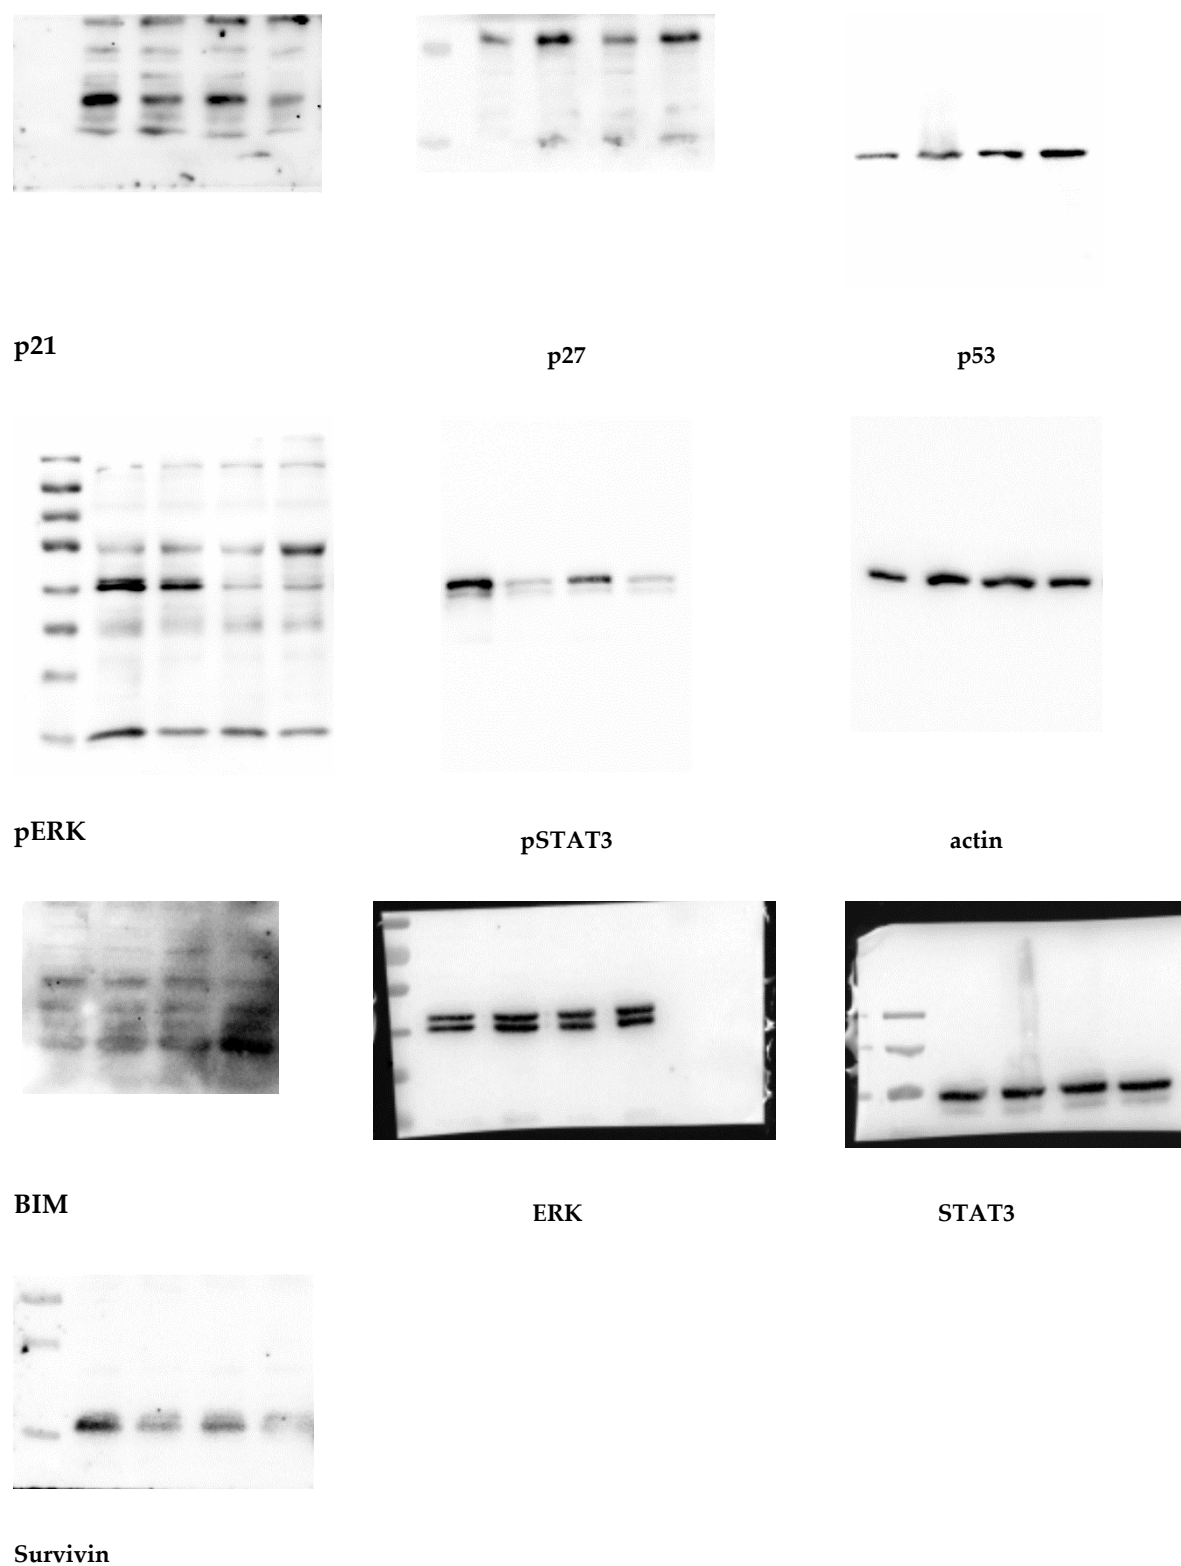

**Figure S17.** Uncropped western blot figure for Figure 6A.

**Table S1.** Antibodies used in this study are listed.

| ANTIBODY | MANUFACTURER              | Cat#  |
|----------|---------------------------|-------|
| Actin    | Sigma                     | A2066 |
| Bcl2     | Cell Signaling Technology | 2870  |

|                                              |                           |           |
|----------------------------------------------|---------------------------|-----------|
| BIM                                          | Sigma                     | B7929     |
| Histone H3                                   | Abcam                     | ab1791    |
| Histone H3K4me3                              | Diagenode                 | C15410003 |
| p16 INK4A (D7C1M)                            | Cell Signaling Technology | 80772     |
| p21 Waf1/Cip1 (12D1)                         | Cell Signaling Technology | 2947      |
| p27 Kip1 (C-19)                              | Santa Cruz Biotechnology  | sc-528    |
| p44/42 MAPK (Erk1/2)                         | Cell Signaling Technology | 9102      |
| p53 (DO-1)                                   | Santa Cruz Biotechnology  | sc-126    |
| STAT3                                        | Cell Signaling Technology | 12640     |
| Survivin                                     | Santa Cruz Biotechnology  | sc-17779  |
| $\gamma$ H2AX (Ser139)                       | Millipore                 | 07-164    |
| Phospho-p38 MAPK (Thr 180/Tyr 182) (D3F9)    | Cell Signaling Technology | 4511      |
| Phospho-p53 (Ser15) (16G8)                   | Cell Signaling Technology | 9286      |
| Phospho-STAT3 (Tyr 705)                      | Thermo Fisher Scientific  | Ma5-15193 |
| Phospho-p44/42 MAPK (Erk1/2) (Thr202/Tyr204) | Cell Signaling Technology | 4370      |
| Phospho-SAPK/ JNK (Thr183/ Tyr 185)          | Cell Signaling Technology | 9251      |

**Table S2.** Primers used in this study, not previously reported. Additional information can be found in refs. 19, 24.

| PRIMER*           | SEQUENCE (5'-3')        |
|-------------------|-------------------------|
| CDKN2A-p14ARF-F   | CTCGTGCTGATGCTACTGAGGA  |
| CDKN2A-p16INK4a-F | GTAAGAGGAGGTGCGGGCG     |
| CDKN2A-R          | GGTCGGCGCAGTTGGGCT      |
| CDKN2B-p15INK4b-F | ACGGAGTCAACCGTTTCGGGAG  |
| CDKN2B-p15INK4b-R | GGTCGGGTGAGAGTGGCAGG    |
| DNMT1-F           | CCATCAGGCATTCTACCA      |
| DNMT1-R           | CGTTCTCCTTGTCTTCTC      |
| GATA3-F           | ACCACAACCACACTCTGGAGGA  |
| GATA3-R           | TCGGTTTCTGGTCTGGATGCCT  |
| IL2RG-R           | GCCAGTCCCTTAGACACACC    |
| IL2RG-F           | ATTTCTGGCTGGAACGGACG    |
| RAB13-F           | GACATCTTGCTCAAGTCAGGAGG |
| RAB13-R           | CAGGGAGCACTTGTGGTGTTC   |
| TGFB1-F           | TACCTGAACCCGTGTGCTCTC   |
| TGFB1-R           | GTTGCTGAGGTATCGCCAGGAA  |

\*F = forward; R = reverse.
